# Supplementary material for: Comparison of the GRUAN data products for Meisei RS-11G and Vaisala RS92-SGP radiosondes at Tateno (36.06° N, 140.13° E), Japan
Source: Copernicus journal article supplement (doi:10.5194/amt-12-3039-2019), 2019-06-04
Supplement: Supplementary file 1 [file amt-12-3039-2019-supplement.pdf]

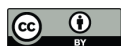

## *Supplement of*

# **Comparison of the GRUAN data products for Meisei RS-11G and Vaisala RS92-SGP radiosondes at Tateno (36.06° N, 140.13° E), Japan**

**Eriko Kobayashi et al.**

*Correspondence to:* Eriko Kobayashi ([eriko-kobayashi@met.kishou.go.jp](mailto:eriko-kobayashi@met.kishou.go.jp))

The copyright of individual parts of the supplement might differ from the CC BY 4.0 License.

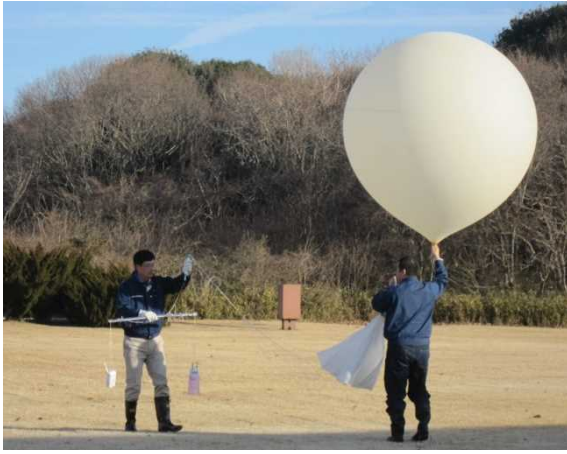

**Figure S1: Preparations for a flight launch at 8:30 local time on January 6, 2017. RS-11G and RS92 radiosondes were hung at the two ends of a plastic cardboard rod.**

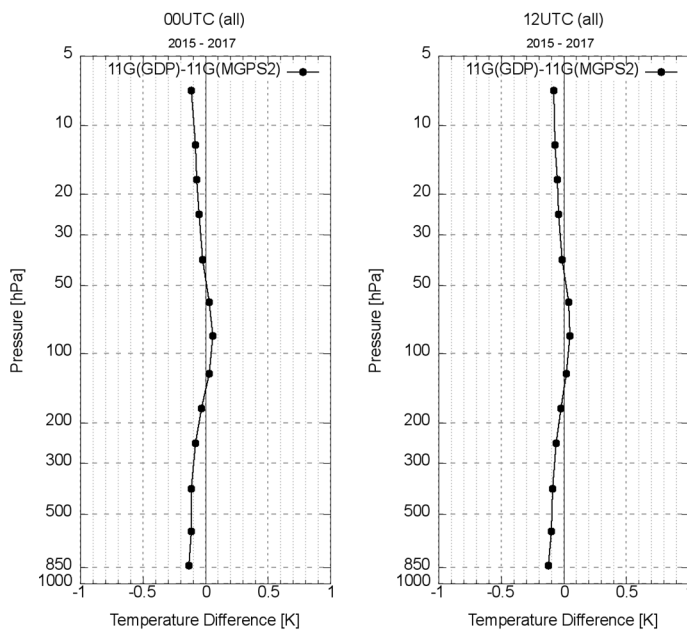

**Figure S2: Profiles of mean temperature differences between the RS-11G GDP and RS-11G MGPS2 (RS-11G GDP minus RS-11G MGPS2) for all measurement data. The RS-11G MGPS2 is an RS-11G product produced with the Meisei MGPS2 software.**

Figure S2 shows temperature comparison results for the RS-11G GDP and the RS-11G product from the Meisei software MGPS2 (RS-11G MGPS2). The main difference between the RS-11G MGPS2 and the RS-11G GDP for temperature data is that the RS-11G GDP uses an improved procedure to derive raw temperature values from the relationship between radiowave frequency and resistance for the thermistor.

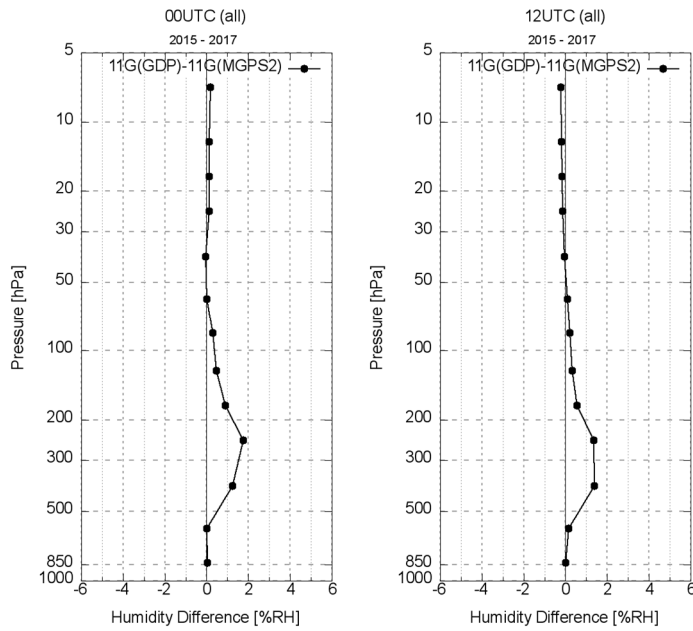

**Figure S3: As for Fig. S2, but for RH.**

Figure S3 shows RH comparison results for the RS-11G GDP and RS-11G MGPS2. In the RH calculation, the main difference between the RS-11G MGPS2 and RS-11G GDP for RH data is that the RS-11G MGPS2 product does not have corrections using the SHC ground check data. Also, the contamination removal filter for rain and cloud droplets has been improved for the RS-11G GDP.
